# Supplementary material for: Elucidating the role of Pyroptosis in papillary thyroid cancer: prognostic, immunological, and therapeutic perspectives
Source: Cancer Cell Int. 2024 Jan 29;24:45. doi: 10.1186/s12935-024-03229-0 (PMC10823616; doi:10.1186/s12935-024-03229-0)
Supplement: Supplementary file 1 — Supplementary Material 1: Collection of supplementary tables. Table S1. Pyroptosis-related genes list. Table S2. Clinical characteristics in the training, the testing, and the entire sets from the TCGA database. Table S3. The gene sets of thyroid-related signatures. Table S4. Immunomodulatory genes list. Table S5. Detail information of the HPA patients and the antibodies. Table S6. Premier sequences for qRT-PCR analysis. [file 12935_2024_3229_MOESM1_ESM.xlsx]

## Sheet: Table S1
Table S1. Pyroptosis-related genes list
Gene symbol	Description	Category	Uniprot ID	GC Id	GeneCards link	Relevance score	GSEA-MSigDB 2023.1.Hs (GO:0070269)	Reactome V85 (R-HSA-5620971)	Reactome V85 (R-HSA-9710421)	Harmonizome	AmiGO2
GSDMD	Gasdermin D	Protein Coding	P57764	GC08P143553	https://www.genecards.org/cgi-bin/carddisp.pl?gene=GSDMD	18.6111	GSDMD	GSDMD			GSDMD
GSDME	Gasdermin E	Protein Coding	O60443	GC07M024699	https://www.genecards.org/cgi-bin/carddisp.pl?gene=GSDME	14.9988	GSDME	GSDME	GSDME		GSDME
NLRP3	NLR Family Pyrin Domain Containing 3	Protein Coding	Q96P20	GC01P247415	https://www.genecards.org/cgi-bin/carddisp.pl?gene=NLRP3	12.3768	NLRP3				NLRP3
CASP1	Caspase 1	Protein Coding	P29466	GC11M105025	https://www.genecards.org/cgi-bin/carddisp.pl?gene=CASP1	10.782	CASP1	CASP1		CASP1	CASP1
CASP4	Caspase 4	Protein Coding	P49662	GC11M104942	https://www.genecards.org/cgi-bin/carddisp.pl?gene=CASP4	10.2895	CASP4	CASP4			CASP4
GSDMB	Gasdermin B	Protein Coding	Q8TAX9	GC17M039904	https://www.genecards.org/cgi-bin/carddisp.pl?gene=GSDMB	8.84198	GSDMB				GSDMB
GSDMC	Gasdermin C	Protein Coding	Q9BYG8	GC08M129705	https://www.genecards.org/cgi-bin/carddisp.pl?gene=GSDMC	8.60256	GSDMC				GSDMC
GSDMA	Gasdermin A	Protein Coding	Q96QA5	GC17P077956	https://www.genecards.org/cgi-bin/carddisp.pl?gene=GSDMA	8.00066	GSDMA				GSDMA
NLRP1	NLR Family Pyrin Domain Containing 1	Protein Coding	Q9C000	GC17M005499	https://www.genecards.org/cgi-bin/carddisp.pl?gene=NLRP1	7.98947	NLRP1				NLRP1
CASP3	Caspase 3	Protein Coding	P42574	GC04M184627	https://www.genecards.org/cgi-bin/carddisp.pl?gene=CASP3	7.68732		CASP3
IL1B	Interleukin 1 Beta	Protein Coding	P01584	GC02M112829	https://www.genecards.org/cgi-bin/carddisp.pl?gene=IL1B	6.21767		IL1B		IL1B
GZMB	Granzyme B	Protein Coding	P10144	GC14M024630	https://www.genecards.org/cgi-bin/carddisp.pl?gene=GZMB	6.14226	GZMB	GZMB			GZMB
CASP8	Caspase 8	Protein Coding	Q14790	GC02P201233	https://www.genecards.org/cgi-bin/carddisp.pl?gene=CASP8	5.75778	CASP8				CASP8
CASP5	Caspase 5	Protein Coding	P51878	GC11M110019	https://www.genecards.org/cgi-bin/carddisp.pl?gene=CASP5	5.20247		CASP5		CASP5
AIM2	Absent In Melanoma 2	Protein Coding	O14862	GC01M159062	https://www.genecards.org/cgi-bin/carddisp.pl?gene=AIM2	5.11075	AIM2			AIM2	AIM2
IL18	Interleukin 18	Protein Coding	Q14116	GC11M112143	https://www.genecards.org/cgi-bin/carddisp.pl?gene=IL18	4.87988		IL18		IL18
PYCARD	PYD And CARD Domain Containing	Protein Coding	Q9ULZ3	GC16M031201	https://www.genecards.org/cgi-bin/carddisp.pl?gene=PYCARD	4.87694	PYCARD				PYCARD
CARD8	Caspase Recruitment Domain Family Member 8	Protein Coding	Q9Y2G2	GC19M079821	https://www.genecards.org/cgi-bin/carddisp.pl?gene=CARD8	4.87417
GZMA	Granzyme A	Protein Coding	P12544	GC05P055102	https://www.genecards.org/cgi-bin/carddisp.pl?gene=GZMA	4.6469	GZMA				GZMA
DPP9	Dipeptidyl Peptidase 9	Protein Coding	Q86TI2	GC19M009342	https://www.genecards.org/cgi-bin/carddisp.pl?gene=DPP9	4.51067	DPP9				DPP9
ZBP1	Z-DNA Binding Protein 1	Protein Coding	Q9H171	GC20M057603	https://www.genecards.org/cgi-bin/carddisp.pl?gene=ZBP1	4.38536	ZBP1				ZBP1
APIP	APAF1 Interacting Protein	Protein Coding	Q96GX9	GC11M034854	https://www.genecards.org/cgi-bin/carddisp.pl?gene=APIP	4.29098	APIP			APIP	APIP
NLRC4	NLR Family CARD Domain Containing 4	Protein Coding	Q9NPP4	GC02M032224	https://www.genecards.org/cgi-bin/carddisp.pl?gene=NLRC4	4.04727	NLRC4			NLRC4	NLRC4
DPP8	Dipeptidyl Peptidase 8	Protein Coding	Q6V1X1	GC15M065442	https://www.genecards.org/cgi-bin/carddisp.pl?gene=DPP8	3.90075
HMGB1	High Mobility Group Box 1	Protein Coding	P09429	GC13M030456	https://www.genecards.org/cgi-bin/carddisp.pl?gene=HMGB1	3.433		HMGB1
CASP6	Caspase 6	Protein Coding	P55212	GC04M109688	https://www.genecards.org/cgi-bin/carddisp.pl?gene=CASP6	3.35501	CASP6				CASP6
MEFV	MEFV Innate Immunity Regulator, Pyrin	Protein Coding	O15553	GC16M010625	https://www.genecards.org/cgi-bin/carddisp.pl?gene=MEFV	3.13205	MEFV				MEFV
DDX3X	DEAD-Box Helicase 3 X-Linked	Protein Coding	O00571	GC0XP041333	https://www.genecards.org/cgi-bin/carddisp.pl?gene=DDX3X	3.02465
NAIP	NLR Family Apoptosis Inhibitory Protein	Protein Coding	Q13075	GC05M070968	https://www.genecards.org/cgi-bin/carddisp.pl?gene=NAIP	3.00247	NAIP				NAIP
CASP7	Caspase 7	Protein Coding	P55210	GC10P113679	https://www.genecards.org/cgi-bin/carddisp.pl?gene=CASP7	2.95408
TRIM24	Tripartite Motif Containing 24	Protein Coding	O15164	GC07P138460	https://www.genecards.org/cgi-bin/carddisp.pl?gene=TRIM24	2.94993
MAPK14	Mitogen-Activated Protein Kinase 14	Protein Coding	Q16539	GC06P104232	https://www.genecards.org/cgi-bin/carddisp.pl?gene=MAPK14	2.88272
MAP3K20	Mitogen-Activated Protein Kinase Kinase Kinase 20	Protein Coding	Q9NYL2	GC02P173076	https://www.genecards.org/cgi-bin/carddisp.pl?gene=MAP3K20	2.84093	MAP3K20				MAP3K20
DHX9	DExH-Box Helicase 9	Protein Coding	Q08211	GC01P182839	https://www.genecards.org/cgi-bin/carddisp.pl?gene=DHX9	2.76142	DHX9				DHX9
NLRP9	NLR Family Pyrin Domain Containing 9	Protein Coding	Q7RTR0	GC19M080198	https://www.genecards.org/cgi-bin/carddisp.pl?gene=NLRP9	2.76142	NLRP9				NLRP9
STAT3	Signal Transducer And Activator Of Transcription 3	Protein Coding	P40763	GC17M042313	https://www.genecards.org/cgi-bin/carddisp.pl?gene=STAT3	2.66504
SIRT1	Sirtuin 1	Protein Coding	Q96EB6	GC10P067884	https://www.genecards.org/cgi-bin/carddisp.pl?gene=SIRT1	2.43318
GBP1	Guanylate Binding Protein 1	Protein Coding	P32455	GC01M089052	https://www.genecards.org/cgi-bin/carddisp.pl?gene=GBP1	2.42102
TP53	Tumor Protein P53	Protein Coding	P04637	GC17M007661	https://www.genecards.org/cgi-bin/carddisp.pl?gene=TP53	2.37306		TP53
TP63	Tumor Protein P63	Protein Coding	Q9H3D4	GC03P189598	https://www.genecards.org/cgi-bin/carddisp.pl?gene=TP63	2.34642		TP63
TRIM21	Tripartite Motif Containing 21	Protein Coding	P19474	GC11M004384	https://www.genecards.org/cgi-bin/carddisp.pl?gene=TRIM21	2.33203
CTSG	Cathepsin G	Protein Coding	P08311	GC14M024573	https://www.genecards.org/cgi-bin/carddisp.pl?gene=CTSG	2.22566
ELANE	Elastase, Neutrophil Expressed	Protein Coding	P08246	GC19P005575	https://www.genecards.org/cgi-bin/carddisp.pl?gene=ELANE	2.10885	ELANE	ELANE			ELANE
MAPK11	Mitogen-Activated Protein Kinase 11	Protein Coding	Q15759	GC22M050263	https://www.genecards.org/cgi-bin/carddisp.pl?gene=MAPK11	2.10049
FOXO3	Forkhead Box O3	Protein Coding	O43524	GC06P108559	https://www.genecards.org/cgi-bin/carddisp.pl?gene=FOXO3	2.05759
NLRP6	NLR Family Pyrin Domain Containing 6	Protein Coding	P59044	GC11P000278	https://www.genecards.org/cgi-bin/carddisp.pl?gene=NLRP6	1.98513	NLRP6				NLRP6
TXNIP	Thioredoxin Interacting Protein	Protein Coding	Q9H3M7	GC01M145992	https://www.genecards.org/cgi-bin/carddisp.pl?gene=TXNIP	1.93997
IFI27	Interferon Alpha Inducible Protein 27	Protein Coding	P40305	GC14P094104	https://www.genecards.org/cgi-bin/carddisp.pl?gene=IFI27	1.88144
TREM2	Triggering Receptor Expressed On Myeloid Cells 2	Protein Coding	Q9NZC2	GC06M081112	https://www.genecards.org/cgi-bin/carddisp.pl?gene=TREM2	1.81303	TREM2				TREM2
NEK7	NIMA Related Kinase 7	Protein Coding	Q8TDX7	GC01P198156	https://www.genecards.org/cgi-bin/carddisp.pl?gene=NEK7	1.76277
NFE2L2	NFE2 Like BZIP Transcription Factor 2	Protein Coding	Q16236	GC02M177227	https://www.genecards.org/cgi-bin/carddisp.pl?gene=NFE2L2	1.71008
TNF	Tumor Necrosis Factor	Protein Coding	P01375	GC06P104098	https://www.genecards.org/cgi-bin/carddisp.pl?gene=TNF	1.68058
ATG5	Autophagy Related 5	Protein Coding	Q9H1Y0	GC06M106045	https://www.genecards.org/cgi-bin/carddisp.pl?gene=ATG5	1.61362
NFKB1	Nuclear Factor Kappa B Subunit 1	Protein Coding	P19838	GC04P102501	https://www.genecards.org/cgi-bin/carddisp.pl?gene=NFKB1	1.59159
ELAVL1	ELAV Like RNA Binding Protein 1	Protein Coding	Q15717	GC19M007958	https://www.genecards.org/cgi-bin/carddisp.pl?gene=ELAVL1	1.59159
GBP5	Guanylate Binding Protein 5	Protein Coding	Q96PP8	GC01M089259	https://www.genecards.org/cgi-bin/carddisp.pl?gene=GBP5	1.56941
TREM1	Triggering Receptor Expressed On Myeloid Cells 1	Protein Coding	Q9NP99	GC06M041267	https://www.genecards.org/cgi-bin/carddisp.pl?gene=TREM1	1.54351
UBR2	Ubiquitin Protein Ligase E3 Component N-Recognin 2	Protein Coding	Q8IWV8	GC06P104292	https://www.genecards.org/cgi-bin/carddisp.pl?gene=UBR2	1.43306
CPTP	Ceramide-1-Phosphate Transfer Protein	Protein Coding	Q5TA50	GC01P005257	https://www.genecards.org/cgi-bin/carddisp.pl?gene=CPTP	1.43306
FOXP3	Forkhead Box P3	Protein Coding	Q9BZS1	GC0XM049250	https://www.genecards.org/cgi-bin/carddisp.pl?gene=FOXP3	1.38269
SESN2	Sestrin 2	Protein Coding	P58004	GC01P029561	https://www.genecards.org/cgi-bin/carddisp.pl?gene=SESN2	1.38269
IRF1	Interferon Regulatory Factor 1	Protein Coding	P10914	GC05M132440	https://www.genecards.org/cgi-bin/carddisp.pl?gene=IRF1	1.36841		IRF1
IRF2	Interferon Regulatory Factor 2	Protein Coding	P14316	GC04M184387	https://www.genecards.org/cgi-bin/carddisp.pl?gene=IRF2	1.36841		IRF2
BRD4	Bromodomain Containing 4	Protein Coding	O60885	GC19M015585	https://www.genecards.org/cgi-bin/carddisp.pl?gene=BRD4	1.33738
IL1A	Interleukin 1 Alpha	Protein Coding	P01583	GC02M112773	https://www.genecards.org/cgi-bin/carddisp.pl?gene=IL1A	1.31219		IL1A
CHMP4B	Charged Multivesicular Body Protein 4B	Protein Coding	Q9H444	GC20P035553	https://www.genecards.org/cgi-bin/carddisp.pl?gene=CHMP4B	1.31219		CHMP4B
FMR1	Fragile X Messenger Ribonucleoprotein 1	Protein Coding	Q06787	GC0XP147968	https://www.genecards.org/cgi-bin/carddisp.pl?gene=FMR1	1.28767
GJA1	Gap Junction Protein Alpha 1	Protein Coding	P17302	GC06P121436	https://www.genecards.org/cgi-bin/carddisp.pl?gene=GJA1	1.26672
SNIP1	Smad Nuclear Interacting Protein 1	Protein Coding	Q8TAD8	GC01M037534	https://www.genecards.org/cgi-bin/carddisp.pl?gene=SNIP1	1.24469
PRDM1	PR/SET Domain 1	Protein Coding	O75626	GC06P107226	https://www.genecards.org/cgi-bin/carddisp.pl?gene=PRDM1	1.22493
PCSK9	Proprotein Convertase Subtilisin/Kexin Type 9	Protein Coding	Q8NBP7	GC01P055039	https://www.genecards.org/cgi-bin/carddisp.pl?gene=PCSK9	1.2214
TNFRSF11B	TNF Receptor Superfamily Member 11b	Protein Coding	O00300	GC08M118923	https://www.genecards.org/cgi-bin/carddisp.pl?gene=TNFRSF11B	1.2214
AGER	Advanced Glycosylation End-Product Specific Receptor	Protein Coding	Q15109	GC06M032180	https://www.genecards.org/cgi-bin/carddisp.pl?gene=AGER	1.2214
GATA1	GATA Binding Protein 1	Protein Coding	P15976	GC0XP048786	https://www.genecards.org/cgi-bin/carddisp.pl?gene=GATA1	1.2214
IL17A	Interleukin 17A	Protein Coding	Q16552	GC06P052186	https://www.genecards.org/cgi-bin/carddisp.pl?gene=IL17A	1.2214
VDR	Vitamin D Receptor	Protein Coding	P11473	GC12M047841	https://www.genecards.org/cgi-bin/carddisp.pl?gene=VDR	1.19661
PKM	Pyruvate Kinase M1/2	Protein Coding	P14618	GC15M072199	https://www.genecards.org/cgi-bin/carddisp.pl?gene=PKM	1.19661
PINK1	PTEN Induced Kinase 1	Protein Coding	Q9BXM7	GC01P020634	https://www.genecards.org/cgi-bin/carddisp.pl?gene=PINK1	1.19661
KIF23	Kinesin Family Member 23	Protein Coding	Q02241	GC15P069414	https://www.genecards.org/cgi-bin/carddisp.pl?gene=KIF23	1.19661
IKBKE	Inhibitor Of Nuclear Factor Kappa B Kinase Subunit Epsilon	Protein Coding	Q14164	GC01P206470	https://www.genecards.org/cgi-bin/carddisp.pl?gene=IKBKE	1.19661
IFI16	Interferon Gamma Inducible Protein 16	Protein Coding	Q16666	GC01P158969	https://www.genecards.org/cgi-bin/carddisp.pl?gene=IFI16	1.19661
SEZ6L2	Seizure Related 6 Homolog Like 2	Protein Coding	Q6UXD5	GC16M040820	https://www.genecards.org/cgi-bin/carddisp.pl?gene=SEZ6L2	1.19661
CRTAC1	Cartilage Acidic Protein 1	Protein Coding	Q9NQ79	GC10M097865	https://www.genecards.org/cgi-bin/carddisp.pl?gene=CRTAC1	1.19661
SMIM1	Small Integral Membrane Protein 1 (Vel Blood Group)	Protein Coding	B2RUZ4	GC01P003772	https://www.genecards.org/cgi-bin/carddisp.pl?gene=SMIM1	1.19661
SQSTM1	Sequestosome 1	Protein Coding	Q13501	GC05P179806	https://www.genecards.org/cgi-bin/carddisp.pl?gene=SQSTM1	1.18856
EZH2	Enhancer Of Zeste 2 Polycomb Repressive Complex 2 Subunit	Protein Coding	Q15910	GC07M148807	https://www.genecards.org/cgi-bin/carddisp.pl?gene=EZH2	1.17645			EZH2
DNMT1	DNA Methyltransferase 1	Protein Coding	P26358	GC19M010133	https://www.genecards.org/cgi-bin/carddisp.pl?gene=DNMT1	1.17645			DNMT1
DNMT3A	DNA Methyltransferase 3 Alpha	Protein Coding	Q9Y6K1	GC02M025228	https://www.genecards.org/cgi-bin/carddisp.pl?gene=DNMT3A	1.17645			DNMT3A
BAX	BCL2 Associated X, Apoptosis Regulator	Protein Coding	Q07812	GC19P048954	https://www.genecards.org/cgi-bin/carddisp.pl?gene=BAX	1.17645		BAX
DNMT3B	DNA Methyltransferase 3 Beta	Protein Coding	Q9UBC3	GC20P032762	https://www.genecards.org/cgi-bin/carddisp.pl?gene=DNMT3B	1.17645			DNMT3B
CYCS	Cytochrome C, Somatic	Protein Coding	P99999	GC07M025118	https://www.genecards.org/cgi-bin/carddisp.pl?gene=CYCS	1.17645		CYCS
POLA1	DNA Polymerase Alpha 1, Catalytic Subunit	Protein Coding	P09884	GC0XP024693	https://www.genecards.org/cgi-bin/carddisp.pl?gene=POLA1	1.17645			POLA1
BAK1	BCL2 Antagonist/Killer 1	Protein Coding	Q16611	GC06M033572	https://www.genecards.org/cgi-bin/carddisp.pl?gene=BAK1	1.17645		BAK1
RBBP4	RB Binding Protein 4, Chromatin Remodeling Factor	Protein Coding	Q09028	GC01P032651	https://www.genecards.org/cgi-bin/carddisp.pl?gene=RBBP4	1.17645			RBBP4
CHMP2B	Charged Multivesicular Body Protein 2B	Protein Coding	Q9UQN3	GC03P087227	https://www.genecards.org/cgi-bin/carddisp.pl?gene=CHMP2B	1.17645		CHMP2B
EED	Embryonic Ectoderm Development	Protein Coding	O75530	GC11P086241	https://www.genecards.org/cgi-bin/carddisp.pl?gene=EED	1.17645			EED
H2AX	H2A.X Variant Histone	Protein Coding	P16104	GC11M119408	https://www.genecards.org/cgi-bin/carddisp.pl?gene=H2AX	1.17645			H2AX
H3-3A	H3.3 Histone A	Protein Coding	P84243	GC01P226062	https://www.genecards.org/cgi-bin/carddisp.pl?gene=H3-3A	1.17645			H3-3A
PRIM1	DNA Primase Subunit 1	Protein Coding	P49642	GC12M057371	https://www.genecards.org/cgi-bin/carddisp.pl?gene=PRIM1	1.17645			PRIM1
RBBP7	RB Binding Protein 7, Chromatin Remodeling Factor	Protein Coding	Q16576	GC0XM016839	https://www.genecards.org/cgi-bin/carddisp.pl?gene=RBBP7	1.17645			RBBP7
SUZ12	SUZ12 Polycomb Repressive Complex 2 Subunit	Protein Coding	Q15022	GC17P031937	https://www.genecards.org/cgi-bin/carddisp.pl?gene=SUZ12	1.17645			SUZ12
POLA2	DNA Polymerase Alpha 2, Accessory Subunit	Protein Coding	Q14181	GC11P072894	https://www.genecards.org/cgi-bin/carddisp.pl?gene=POLA2	1.17645			POLA2
PRIM2	DNA Primase Subunit 2	Protein Coding	P49643	GC06P104469	https://www.genecards.org/cgi-bin/carddisp.pl?gene=PRIM2	1.17645			PRIM2
H3-3B	H3.3 Histone B	Protein Coding	P84243	GC17M075823	https://www.genecards.org/cgi-bin/carddisp.pl?gene=H3-3B	1.17645
CHMP2A	Charged Multivesicular Body Protein 2A	Protein Coding	O43633	GC19M058551	https://www.genecards.org/cgi-bin/carddisp.pl?gene=CHMP2A	1.17645		CHMP2A
CHMP3	Charged Multivesicular Body Protein 3	Protein Coding	Q9Y3E7	GC02M086505	https://www.genecards.org/cgi-bin/carddisp.pl?gene=CHMP3	1.17645		CHMP3
H2BC21	H2B Clustered Histone 21	Protein Coding	Q16778	GC01M155825	https://www.genecards.org/cgi-bin/carddisp.pl?gene=H2BC21	1.17645			H2BC21
H3C1	H3 Clustered Histone 1	Protein Coding	P68431	GC06P103886	https://www.genecards.org/cgi-bin/carddisp.pl?gene=H3C1	1.17645			H3C1
H4C3	H4 Clustered Histone 3	Protein Coding	P62805	GC06P103893	https://www.genecards.org/cgi-bin/carddisp.pl?gene=H4C3	1.17645
H2AC20	H2A Clustered Histone 20	Protein Coding	Q16777	GC01P154223	https://www.genecards.org/cgi-bin/carddisp.pl?gene=H2AC20	1.17645			H2AC20
CHMP6	Charged Multivesicular Body Protein 6	Protein Coding	Q96FZ7	GC17P080991	https://www.genecards.org/cgi-bin/carddisp.pl?gene=CHMP6	1.17645		CHMP6
H2AZ2	H2A.Z Variant Histone 2	Protein Coding	Q71UI9	GC07M044836	https://www.genecards.org/cgi-bin/carddisp.pl?gene=H2AZ2	1.17645			H2AZ2
H2BC11	H2B Clustered Histone 11	Protein Coding	P06899	GC06M080586	https://www.genecards.org/cgi-bin/carddisp.pl?gene=H2BC11	1.17645			H2BC11
H4C11	H4 Clustered Histone 11	Protein Coding	P62805	GC06P103950	https://www.genecards.org/cgi-bin/carddisp.pl?gene=H4C11	1.17645
H4C16	H4 Histone 16	Protein Coding	P62805	GC12M025134	https://www.genecards.org/cgi-bin/carddisp.pl?gene=H4C16	1.17645
H4C9	H4 Clustered Histone 9	Protein Coding	P62805	GC06P105154	https://www.genecards.org/cgi-bin/carddisp.pl?gene=H4C9	1.17645
CHMP4C	Charged Multivesicular Body Protein 4C	Protein Coding	Q96CF2	GC08P081732	https://www.genecards.org/cgi-bin/carddisp.pl?gene=CHMP4C	1.17645		CHMP4C
CHMP7	Charged Multivesicular Body Protein 7	Protein Coding	Q8WUX9	GC08P023243	https://www.genecards.org/cgi-bin/carddisp.pl?gene=CHMP7	1.17645		CHMP7
H2BC14	H2B Clustered Histone 14	Protein Coding	Q99879	GC06P103948	https://www.genecards.org/cgi-bin/carddisp.pl?gene=H2BC14	1.17645			H2BC14
H2BC9	H2B Clustered Histone 9	Protein Coding	Q93079	GC06P105148	https://www.genecards.org/cgi-bin/carddisp.pl?gene=H2BC9	1.17645			H2BC9
H3C2	H3 Clustered Histone 2	Protein Coding	P68431	GC06M026104	https://www.genecards.org/cgi-bin/carddisp.pl?gene=H3C2	1.17645
H4C1	H4 Clustered Histone 1	Protein Coding	P62805	GC06P103887	https://www.genecards.org/cgi-bin/carddisp.pl?gene=H4C1	1.17645			H4C1
H4C2	H4 Clustered Histone 2	Protein Coding	P62805	GC06M026026	https://www.genecards.org/cgi-bin/carddisp.pl?gene=H4C2	1.17645
H4C5	H4 Clustered Histone 5	Protein Coding	P62805	GC06P105152	https://www.genecards.org/cgi-bin/carddisp.pl?gene=H4C5	1.17645
H4C8	H4 Clustered Histone 8	Protein Coding	P62805	GC06M081771	https://www.genecards.org/cgi-bin/carddisp.pl?gene=H4C8	1.17645
CHMP4A	Charged Multivesicular Body Protein 4A	Protein Coding	Q9BY43	GC14M025389	https://www.genecards.org/cgi-bin/carddisp.pl?gene=CHMP4A	1.17645		CHMP4A
H2AC4	H2A Clustered Histone 4	Protein Coding	P04908	GC06M026105	https://www.genecards.org/cgi-bin/carddisp.pl?gene=H2AC4	1.17645			H2AC4
H2BC13	H2B Clustered Histone 13	Protein Coding	Q99880	GC06M080669	https://www.genecards.org/cgi-bin/carddisp.pl?gene=H2BC13	1.17645			H2BC13
H2BC15	H2B Clustered Histone 15	Protein Coding	Q99877	GC06P103952	https://www.genecards.org/cgi-bin/carddisp.pl?gene=H2BC15	1.17645			H2BC15
H2BC3	H2B Clustered Histone 3	Protein Coding	P33778	GC06M080532	https://www.genecards.org/cgi-bin/carddisp.pl?gene=H2BC3	1.17645			H2BC3
H2BC4	H2B Clustered Histone 4	Protein Coding	P62807	GC06M081757	https://www.genecards.org/cgi-bin/carddisp.pl?gene=H2BC4	1.17645			H2BC4
H3C11	H3 Clustered Histone 11	Protein Coding	P68431	GC06M081759	https://www.genecards.org/cgi-bin/carddisp.pl?gene=H3C11	1.17645
H3C12	H3 Clustered Histone 12	Protein Coding	P68431	GC06M081761	https://www.genecards.org/cgi-bin/carddisp.pl?gene=H3C12	1.17645
H3C4	H3 Clustered Histone 4	Protein Coding	P68431	GC06M081762	https://www.genecards.org/cgi-bin/carddisp.pl?gene=H3C4	1.17645
H4C12	H4 Clustered Histone 12	Protein Coding	P62805	GC06M081767	https://www.genecards.org/cgi-bin/carddisp.pl?gene=H4C12	1.17645
H4C4	H4 Clustered Histone 4	Protein Coding	P62805	GC06M081769	https://www.genecards.org/cgi-bin/carddisp.pl?gene=H4C4	1.17645
H2AC6	H2A Clustered Histone 6	Protein Coding	Q93077	GC06P105139	https://www.genecards.org/cgi-bin/carddisp.pl?gene=H2AC6	1.17645			H2AC6
H2AC7	H2A Clustered Histone 7	Protein Coding	P20671	GC06M081755	https://www.genecards.org/cgi-bin/carddisp.pl?gene=H2AC7	1.17645			H2AC7
H2BC1	H2B Clustered Histone 1	Protein Coding	Q96A08	GC06P105143	https://www.genecards.org/cgi-bin/carddisp.pl?gene=H2BC1	1.17645			H2BC1
H2BC10	H2B Clustered Histone 10	Protein Coding	P62807	GC06P105144	https://www.genecards.org/cgi-bin/carddisp.pl?gene=H2BC10	1.17645
H2BC12	H2B Clustered Histone 12	Protein Coding	O60814	GC06M080589	https://www.genecards.org/cgi-bin/carddisp.pl?gene=H2BC12	1.17645			H2BC12
H2BC5	H2B Clustered Histone 5	Protein Coding	P58876	GC06P105145	https://www.genecards.org/cgi-bin/carddisp.pl?gene=H2BC5	1.17645			H2BC5
H2BC6	H2B Clustered Histone 6	Protein Coding	P62807	GC06P105146	https://www.genecards.org/cgi-bin/carddisp.pl?gene=H2BC6	1.17645
H3C10	H3 Clustered Histone 10	Protein Coding	P68431	GC06P103949	https://www.genecards.org/cgi-bin/carddisp.pl?gene=H3C10	1.17645
H3C14	H3 Clustered Histone 14	Protein Coding	Q71DI3	GC01M155820	https://www.genecards.org/cgi-bin/carddisp.pl?gene=H3C14	1.17645
H3C3	H3 Clustered Histone 3	Protein Coding	P68431	GC06P103889	https://www.genecards.org/cgi-bin/carddisp.pl?gene=H3C3	1.17645
H3C6	H3 Clustered Histone 6	Protein Coding	P68431	GC06P105150	https://www.genecards.org/cgi-bin/carddisp.pl?gene=H3C6	1.17645
H3C8	H3 Clustered Histone 8	Protein Coding	P68431	GC06M081765	https://www.genecards.org/cgi-bin/carddisp.pl?gene=H3C8	1.17645
H4C6	H4 Clustered Histone 6	Protein Coding	P62805	GC06P105153	https://www.genecards.org/cgi-bin/carddisp.pl?gene=H4C6	1.17645
H2AC14	H2A Clustered Histone 14	Protein Coding	Q99878	GC06M080671	https://www.genecards.org/cgi-bin/carddisp.pl?gene=H2AC14	1.17645			H2AC14
H2AJ	H2A.J Histone	Protein Coding	Q9BTM1	GC12P028587	https://www.genecards.org/cgi-bin/carddisp.pl?gene=H2AJ	1.17645			H2AJ
H2BC17	H2B Clustered Histone 17	Protein Coding	P23527	GC06P103960	https://www.genecards.org/cgi-bin/carddisp.pl?gene=H2BC17	1.17645			H2BC17
H2BC26	H2B Clustered Histone 26	Protein Coding	Q8N257	GC01P230095	https://www.genecards.org/cgi-bin/carddisp.pl?gene=H2BC26	1.17645			H2BC26
H3C7	H3 Clustered Histone 7	Protein Coding	P68431	GC06M081763	https://www.genecards.org/cgi-bin/carddisp.pl?gene=H3C7	1.17645
H4C13	H4 Clustered Histone 13	Protein Coding	P62805	GC06M081768	https://www.genecards.org/cgi-bin/carddisp.pl?gene=H4C13	1.17645
H2AC8	H2A Clustered Histone 8	Protein Coding	P04908	GC06P105141	https://www.genecards.org/cgi-bin/carddisp.pl?gene=H2AC8	1.17645
H2BC8	H2B Clustered Histone 8	Protein Coding	P62807	GC06M081758	https://www.genecards.org/cgi-bin/carddisp.pl?gene=H2BC8	1.17645
H4C14	H4 Clustered Histone 14	Protein Coding	P62805	GC01P149832	https://www.genecards.org/cgi-bin/carddisp.pl?gene=H4C14	1.17645
H2BC7	H2B Clustered Histone 7	Protein Coding	P62807	GC06P105147	https://www.genecards.org/cgi-bin/carddisp.pl?gene=H2BC7	1.17645
H3C13	H3 Clustered Histone 13	Protein Coding	Q71DI3	GC01M155813	https://www.genecards.org/cgi-bin/carddisp.pl?gene=H3C13	1.17645
H3C15	H3 Clustered Histone 15	Protein Coding	Q71DI3	GC01P154215	https://www.genecards.org/cgi-bin/carddisp.pl?gene=H3C15	1.17645			H3C15
H2AB1	H2A.B Variant Histone 1	Protein Coding	P0C5Y9	GC0XP154885	https://www.genecards.org/cgi-bin/carddisp.pl?gene=H2AB1	1.17645			H2AB1
H2AC18	H2A Clustered Histone 18	Protein Coding	Q6FI13	GC01M155818	https://www.genecards.org/cgi-bin/carddisp.pl?gene=H2AC18	1.17645			H2AC18
H4C15	H4 Clustered Histone 15	Protein Coding	P62805	GC01M155821	https://www.genecards.org/cgi-bin/carddisp.pl?gene=H4C15	1.17645
H2AC19	H2A Clustered Histone 19	Protein Coding	Q6FI13	GC01P154218	https://www.genecards.org/cgi-bin/carddisp.pl?gene=H2AC19	1.17645
RNF103-CHMP3	RNF103-CHMP3 Readthrough	Protein Coding		GC02M086503	https://www.genecards.org/cgi-bin/carddisp.pl?gene=RNF103-CHMP3	1.17645
LOC102724334	Histone H2B Type F-S-Like	Protein Coding		GC21M005972	https://www.genecards.org/cgi-bin/carddisp.pl?gene=LOC102724334	1.17645
ETS1	ETS Proto-Oncogene 1, Transcription Factor	Protein Coding	P14921	GC11M128458	https://www.genecards.org/cgi-bin/carddisp.pl?gene=ETS1	1.16997
TET2	Tet Methylcytosine Dioxygenase 2	Protein Coding	Q6N021	GC04P105145	https://www.genecards.org/cgi-bin/carddisp.pl?gene=TET2	1.16997
TRAF6	TNF Receptor Associated Factor 6	Protein Coding	Q9Y4K3	GC11M036467	https://www.genecards.org/cgi-bin/carddisp.pl?gene=TRAF6	1.16997
INPP5D	Inositol Polyphosphate-5-Phosphatase D	Protein Coding	Q92835	GC02P233059	https://www.genecards.org/cgi-bin/carddisp.pl?gene=INPP5D	1.16997
SNRPN	Small Nuclear Ribonucleoprotein Polypeptide N	Protein Coding	P63162	GC15P024823	https://www.genecards.org/cgi-bin/carddisp.pl?gene=SNRPN	1.16997
CEBPB	CCAAT Enhancer Binding Protein Beta	Protein Coding	P17676	GC20P050190	https://www.genecards.org/cgi-bin/carddisp.pl?gene=CEBPB	1.16997
CTSV	Cathepsin V	Protein Coding	O60911	GC09M097029	https://www.genecards.org/cgi-bin/carddisp.pl?gene=CTSV	1.16997
RBMX	RNA Binding Motif Protein X-Linked	Protein Coding	P38159	GC0XM136848	https://www.genecards.org/cgi-bin/carddisp.pl?gene=RBMX	1.16997
UTS2	Urotensin 2	Protein Coding	O95399	GC01M007843	https://www.genecards.org/cgi-bin/carddisp.pl?gene=UTS2	1.16997
SIGLEC15	Sialic Acid Binding Ig Like Lectin 15	Protein Coding	Q6ZMC9	GC18P045825	https://www.genecards.org/cgi-bin/carddisp.pl?gene=SIGLEC15	1.16997
ZNF532	Zinc Finger Protein 532	Protein Coding	Q9HCE3	GC18P058862	https://www.genecards.org/cgi-bin/carddisp.pl?gene=ZNF532	1.16997
MLKL	Mixed Lineage Kinase Domain Like Pseudokinase	Protein Coding	Q8NB16	GC16M074720	https://www.genecards.org/cgi-bin/carddisp.pl?gene=MLKL	1.14542
PTPN11	Protein Tyrosine Phosphatase Non-Receptor Type 11	Protein Coding	Q06124	GC12P112418	https://www.genecards.org/cgi-bin/carddisp.pl?gene=PTPN11	1.141
APOE	Apolipoprotein E	Protein Coding	P02649	GC19P083472	https://www.genecards.org/cgi-bin/carddisp.pl?gene=APOE	1.141
PAK2	P21 (RAC1) Activated Kinase 2	Protein Coding	Q13177	GC03P196739	https://www.genecards.org/cgi-bin/carddisp.pl?gene=PAK2	1.141
SDHB	Succinate Dehydrogenase Complex Iron Sulfur Subunit B	Protein Coding	P21912	GC01M018664	https://www.genecards.org/cgi-bin/carddisp.pl?gene=SDHB	1.141
IKBKG	Inhibitor Of Nuclear Factor Kappa B Kinase Regulatory Subunit Gamma	Protein Coding	Q9Y6K9	GC0XP154541	https://www.genecards.org/cgi-bin/carddisp.pl?gene=IKBKG	1.141
ANXA1	Annexin A1	Protein Coding	P04083	GC09P073151	https://www.genecards.org/cgi-bin/carddisp.pl?gene=ANXA1	1.141
EEF2K	Eukaryotic Elongation Factor 2 Kinase	Protein Coding	O00418	GC16P046646	https://www.genecards.org/cgi-bin/carddisp.pl?gene=EEF2K	1.141
P2RX7	Purinergic Receptor P2X 7	Protein Coding	Q99572	GC12P128227	https://www.genecards.org/cgi-bin/carddisp.pl?gene=P2RX7	1.141
CD274	CD274 Molecule	Protein Coding	Q9NZQ7	GC09P005450	https://www.genecards.org/cgi-bin/carddisp.pl?gene=CD274	1.141
FPR2	Formyl Peptide Receptor 2	Protein Coding	P25090	GC19P051752	https://www.genecards.org/cgi-bin/carddisp.pl?gene=FPR2	1.141
HTRA1	HtrA Serine Peptidase 1	Protein Coding	Q92743	GC10P122461	https://www.genecards.org/cgi-bin/carddisp.pl?gene=HTRA1	1.141
SETD7	SET Domain Containing 7, Histone Lysine Methyltransferase	Protein Coding	Q8WTS6	GC04M139495	https://www.genecards.org/cgi-bin/carddisp.pl?gene=SETD7	1.141
ATP6AP1	ATPase H+ Transporting Accessory Protein 1	Protein Coding	Q15904	GC0XP154428	https://www.genecards.org/cgi-bin/carddisp.pl?gene=ATP6AP1	1.141
TRIM25	Tripartite Motif Containing 25	Protein Coding	Q14258	GC17M056836	https://www.genecards.org/cgi-bin/carddisp.pl?gene=TRIM25	1.141
NDUFA13	NADH:Ubiquinone Oxidoreductase Subunit A13	Protein Coding	Q9P0J0	GC19P019515	https://www.genecards.org/cgi-bin/carddisp.pl?gene=NDUFA13	1.141
SMC4	Structural Maintenance Of Chromosomes 4	Protein Coding	Q9NTJ3	GC03P160399	https://www.genecards.org/cgi-bin/carddisp.pl?gene=SMC4	1.141
SYVN1	Synoviolin 1	Protein Coding	Q86TM6	GC11M109220	https://www.genecards.org/cgi-bin/carddisp.pl?gene=SYVN1	1.141
NLRX1	NLR Family Member X1	Protein Coding	Q86UT6	GC11P119166	https://www.genecards.org/cgi-bin/carddisp.pl?gene=NLRX1	1.141
FGF21	Fibroblast Growth Factor 21	Protein Coding	Q9NSA1	GC19P083611	https://www.genecards.org/cgi-bin/carddisp.pl?gene=FGF21	1.141
IL37	Interleukin 37	Protein Coding	Q9NZH6	GC02P125992	https://www.genecards.org/cgi-bin/carddisp.pl?gene=IL37	1.141
TLR4	Toll Like Receptor 4	Protein Coding	O00206	GC09P117704	https://www.genecards.org/cgi-bin/carddisp.pl?gene=TLR4	1.10896
APOA1	Apolipoprotein A1	Protein Coding	P02647	GC11M116835	https://www.genecards.org/cgi-bin/carddisp.pl?gene=APOA1	1.10896
MMP1	Matrix Metallopeptidase 1	Protein Coding	P03956	GC11M109978	https://www.genecards.org/cgi-bin/carddisp.pl?gene=MMP1	1.10896
IKZF1	IKAROS Family Zinc Finger 1	Protein Coding	Q13422	GC07P050303	https://www.genecards.org/cgi-bin/carddisp.pl?gene=IKZF1	1.10896
NEDD4	NEDD4 E3 Ubiquitin Protein Ligase	Protein Coding	P46934	GC15M055826	https://www.genecards.org/cgi-bin/carddisp.pl?gene=NEDD4	1.10896
TPM3	Tropomyosin 3	Protein Coding	P06753	GC01M154155	https://www.genecards.org/cgi-bin/carddisp.pl?gene=TPM3	1.10896
BSG	Basigin (Ok Blood Group)	Protein Coding	P35613	GC19P000571	https://www.genecards.org/cgi-bin/carddisp.pl?gene=BSG	1.10896
PGF	Placental Growth Factor	Protein Coding	P49763	GC14M074941	https://www.genecards.org/cgi-bin/carddisp.pl?gene=PGF	1.10896
USP14	Ubiquitin Specific Peptidase 14	Protein Coding	P54578	GC18P000158	https://www.genecards.org/cgi-bin/carddisp.pl?gene=USP14	1.10896
CXCL8	C-X-C Motif Chemokine Ligand 8	Protein Coding	P10145	GC04P073740	https://www.genecards.org/cgi-bin/carddisp.pl?gene=CXCL8	1.10896
TFAM	Transcription Factor A, Mitochondrial	Protein Coding	Q00059	GC10P058385	https://www.genecards.org/cgi-bin/carddisp.pl?gene=TFAM	1.10896
USP25	Ubiquitin Specific Peptidase 25	Protein Coding	Q9UHP3	GC21P015730	https://www.genecards.org/cgi-bin/carddisp.pl?gene=USP25	1.10896
CEP55	Centrosomal Protein 55	Protein Coding	Q53EZ4	GC10P093496	https://www.genecards.org/cgi-bin/carddisp.pl?gene=CEP55	1.10896
FAT1	FAT Atypical Cadherin 1	Protein Coding	Q14517	GC04M186587	https://www.genecards.org/cgi-bin/carddisp.pl?gene=FAT1	1.10896
SLC16A4	Solute Carrier Family 16 Member 4	Protein Coding	O15374	GC01M110362	https://www.genecards.org/cgi-bin/carddisp.pl?gene=SLC16A4	1.10896
USF2	Upstream Transcription Factor 2, C-Fos Interacting	Protein Coding	Q15853	GC19P035268	https://www.genecards.org/cgi-bin/carddisp.pl?gene=USF2	1.10896
IL32	Interleukin 32	Protein Coding	P24001	GC16P045978	https://www.genecards.org/cgi-bin/carddisp.pl?gene=IL32	1.10896
SLC30A7	Solute Carrier Family 30 Member 7	Protein Coding	Q8NEW0	GC01P100896	https://www.genecards.org/cgi-bin/carddisp.pl?gene=SLC30A7	1.10896
YTHDF2	YTH N6-Methyladenosine RNA Binding Protein F2	Protein Coding	Q9Y5A9	GC01P029588	https://www.genecards.org/cgi-bin/carddisp.pl?gene=YTHDF2	1.10896
PIF1	PIF1 5'-To-3' DNA Helicase	Protein Coding	Q9H611	GC15M064815	https://www.genecards.org/cgi-bin/carddisp.pl?gene=PIF1	1.10896
CHRFAM7A	CHRNA7 (Exons 5-10) And FAM7A (Exons A-E) Fusion	Protein Coding	Q494W8	GC15M030360	https://www.genecards.org/cgi-bin/carddisp.pl?gene=CHRFAM7A	1.10896
H2BC12L	H2B Clustered Histone 12 Like	Protein Coding	P57053	GC21P043569	https://www.genecards.org/cgi-bin/carddisp.pl?gene=H2BC12L	/			H2BC12L
H2AZ1	H2A.Z Variant Histone 1	Protein Coding	P0C0S5	GC04M099949	https://www.genecards.org/cgi-bin/carddisp.pl?gene=H2AZ1	/			H2AZ1
CAMP	Cathelicidin Antimicrobial Peptide	Protein Coding	P49913	GC03P051545	https://www.genecards.org/cgi-bin/carddisp.pl?gene=CAMP	0.861011				CAMP
IL36G	Interleukin 36 Gamma	Protein Coding	Q9NZH8	GC02P112973	https://www.genecards.org/cgi-bin/carddisp.pl?gene=IL36G	0.693236				IL36G
TUBB6	Tubulin Beta 6 Class V	Protein Coding	Q9BUF5	GC18P012307	https://www.genecards.org/cgi-bin/carddisp.pl?gene=TUBB6	0.383909				TUBB6
References
1. The Human Molecular Signatures Database (MSigDB) [Internet]. [cited 2023 Apr 12]. Available from: https://www.gsea-msigdb.org/gsea/msigd
2. The Reactome database [Internet]. [cited 2023 May 16]. Available from: https://reactome.org
3. GeneCards: The Human Gene Database [Internet]. [cited 2023 Jun 8]. Available from: https://www.genecards.org

## Sheet: Table S2
Table S2. Clinical characteristics in the training, the testing, and the entire sets from the TCGA database
	Entire cohort	Training set	Testing set	Statistic	P value
	(N=477)	(N=334)	(N=143)
Age				1.207	0.272
<55	324 (67.9%)	232 (69.5%)	92 (64.3%)
>=55	153 (32.1%)	102 (30.5%)	51 (35.7%)
Gender				0.016	0.898
Female	345 (72.3%)	241 (72.2%)	104 (72.7%)
Male	132 (27.7%)	93 (27.8%)	39 (27.3%)
T category				2.612	0.455
T1	136 (28.5%)	94 (28.1%)	42 (29.4%)
T2	157 (32.9%)	104 (31.1%)	53 (37.1%)
T3	164 (34.4%)	122 (36.5%)	42 (29.4%)
T4	20 (4.2%)	14 (4.2%)	6 (4.2%)
N category				0.206	0.65
N0	266 (55.8%)	184 (55.1%)	82 (57.3%)
N1	211 (44.2%)	150 (44.9%)	61 (42.7%)
M category #				0.347	0.556
M0	468 (98.1%)	329 (98.5%)	139 (97.2%)
M1	9 (1.9%)	5 (1.5%)	4 (2.8%)
TNM 8th #				1.898	0.594
Stage I	381 (79.9%)	271 (81.1%)	110 (76.9%)
Stage II	77 (16.1%)	51 (15.3%)	26 (18.2%)
Stage III	13 (2.7%)	9 (2.7%)	4 (2.8%)
Stage IV	6 (1.3%)	3 (0.9%)	3 (2.1%)
TCFi events				0.043	0.834
No	435 (91.2%)	304 (91.0%)	131 (91.6%)
Yes	42 (8.8%)	30 (9.0%)	12 (8.4%)
Follow-up year				-0.355	0.723
Mean (SD)	3.43 (2.71)	3.45 (2.72)	3.36 (2.70)
Median [Min, Max]	2.61[0.334, 14.9]	2.63 [0.342, 14.9]	2.57 [0.334, 10.8]
Statistical analysis was conducted between the training and testing sets. For categorical variables, performed a chi-square test (# with Yate’s continuity correction), for numeric variables, performed a standard 2-sample t-test.

## Sheet: Table S3
Table S3. The gene sets of thyroid-related signatures
Signature	Description	Source	References	Version	Gene set	Gene Number
Thyroid gland development	The process whose specific outcome is the progression of the thyroid gland over time, from its formation to the mature structure. The thyroid gland is an endoderm-derived gland that produces thyroid hormone. [GOC:dgh]	http://amigo.geneontology.org/amigo/term/GO:0030878	GO:0030878	2023.2.Hs	CGA,NKX2-5,CTNS,EDN1,EDNRA,FGF8,FGF10,FOXE1,HIPK2,HOXA3,HOXA5,HOXB3,HOXD3,SMAD3,MAPK1,MAPK3,MAP2K1,MAP2K2,RAF1,RAP1GAP,SHH,SIX1,SRF,BRAF,TBX1,TG,THRA,NKX2-1,PAX8,TUBB1,HESX1	31
Thyroid hormone metabolic progress	The chemical reactions and pathways involving any of the compounds secreted by the thyroid gland, largely thyroxine and triiodothyronine. [GOC:jl, ISBN:0198506732]	http://amigo.geneontology.org/amigo/term/GO:0042403	GO:0042403	2023.2.Hs	CPQ,CGA,SLC26A7,SLC16A10,CRYM,CTNS,CTSB,CTSK,DIO1,DIO2,DIO3,FOXE1,GATA3,SULT1B1,HPN,IYD,DUOXA2,DUOX2,GCNT4,DUOX1,SLCO1C1,MED1,SLC5A5,SLC16A2,SULT2A1,TG,TPO,PAX8,DUOXA1	29
Thyroid hormone generation	The formation of either of the compounds secreted by the thyroid gland, mainly thyroxine and triiodothyronine. This is achieved by the iodination and joining of tyrosine molecules to form the precursor thyroglobin, proteolysis of this precursor gives rise to the thyroid hormones. [GOC:jl, ISBN:0716720094]	http://amigo.geneontology.org/amigo/term/GO:0006590	GO:0006590	2023.2.Hs	CPQ,CGA,SLC26A7,SLC16A10,CTNS,CTSB,CTSK,DIO1,DIO2,FOXE1,GATA3,HPN,DUOXA2,DUOX2,DUOX1,SLCO1C1,MED1,SLC5A5,SLC16A2,TG,TPO,PAX8,DUOXA1	23
Papillary thyroid carcinoma	The presence of a papillary adenocarcinoma of the thyroid gland. [HPO:probinson]	https://hpo.jax.org/app/browse/term/HP:0002895	HP:0002895	2023.1.Hs: Updated to HPO Release 2023-01-27	SEC23B,JAG1,ARID2,FOXE1,DICER1,HABP2,APC,HRAS,NRAS,PDE11A,PRKAR1A,ARID1B,SRGAP1,DPF2,SMARCA4,SMARCB1,SMARCC2,SMARCD1,SMARCE1,SOX4,SOX11,NKX2-1,ARID1A,MINPP1	24
Thyroid carcinoma	The presence of a carcinoma of the thyroid gland. [HPO:probinson]	https://hpo.jax.org/app/browse/term/HP:0002890	HP:0002890	2023.1.Hs: Updated to HPO Release 2023-01-27	KLLN,RASGRP1,CDKN1A,CDKN1B,CDKN2A,CDKN2B,CDKN2C,SEC23B,CHEK2,JAG1,ARID2,FLCN,USF3,AKT1,HEPACAM,FOXI1,FOXE1,DICER1,GREM1,HABP2,APC,HRAS,FAS,FASLG,KCNJ10,MDM2,MEN1,NRAS,PDE11A,SLC26A4,PIK3CA,PRKAR1A,PRKCD,PTEN,ARID1B,SRGAP1,DPF2,RET,SDHB,SDHC,SDHD,BMPR1A,SMARCA4,SMARCB1,SMARCC2,SMARCD1,SMARCE1,SOX4,SOX11,TG,NKX2-1,TP53,WRN,CDC73,ARID1A,CASP10,MINPP1,KEAP1	58
Thyroiditis	Inflammation of the thyroid gland. [HPO:probinson]	https://hpo.jax.org/app/browse/term/HP:0100646	HP:0100646	2023.1.Hs: Updated to HPO Release 2023-01-27	ADA,TOM1,IL18BP,RASGRP1,CDKN1B,SEC23B,SEMA4D,CLCNKB,CTLA4,AKT1,NLRP1,SLC37A4,FOXD3,GPR35,HLA-DQA1,HLA-DQB1,FAS,IL2RA,FASLG,IL2RG,IL7R,LIG4,MST1,NFKB2,FOXP3,ADA2,PIK3CA,PI4KA,PLCG2,POLG,CHD7,PRKCD,TTC7A,PTEN,ZFAT,RAG1,RAG2,RMRP,DCLRE1C,SLC12A3,STAT1,STAT5B,TBX2,TCF4,TG,C1S,ITCH,CASP10,SOCS1,LRBA	50
Abnormal thyroid stimulating hormone level	Abnormal thyroid-stimulating hormone level. Any deviation from the normal amount of the thyroid-stimulating hormone (TSH), which is produced by the anterior pituitary gland and stimulates the function of the thyroid gland.	https://hpo.jax.org/app/browse/term/HP:0031097	HP:0031097	2023.1.Hs: Updated to HPO Release 2023-01-27	KCNJ18,CPE,NKX2-5,GLIS3,ALB,SMC5,DMXL2,GNAS,IGSF1,IYD,DUOXA2,OTX2,SMARCAL1,DUOX2,MRPS7,PDGFRB,PMM2,POU1F1,SLC25A36,PRKAR1A,PROP1,PSMB8,ROBO1,CDH23,SLC5A5,SLC16A2,TBL1X,TG,THRB,NKX2-1,TPO,TRHR,,TSHB,TSHR,SLC35A2,ALMS1,PAX8,SECISBP2,DCAF17,LHX3,PLVAP,IRS4,HESX1,LHX4	44
Abnormality of the thyroid gland	An abnormality of the thyroid gland.	https://hpo.jax.org/app/browse/term/HP:0000820	HP:0000820	2023.1.Hs: Updated to HPO Release 2023-01-27	ADA,KCNJ18,KLLN,RNU7-1,GNE,TOM1,DNM1L,IL18BP,RASGRP1,CDKN1A,CDKN1B,STUB1,UBE4B,CDKN1C,CDKN2A,APC2,ADAR,CDKN2B,CDKN2C,SEC23B,SEMA4D,SEMA3C,DEAF1,IPO8,RNASEH2A,TXNRD2,PDPN,KLF1,STAG2,SIX2,RAI1,WDR4,MALT1,PNPLA6,ADCY5,POLR3A,SUPT16H,CHEK2,POLG2,TREX1,FDX2,ADAT3,BUD23,CLCNKB,PROKR2,TANGO2,DNAJC19,COMT,LSM11,TMEM270,CPE,B3GLCT,CCBE1,NKX2-5,CTLA4,CTNS,CTNNB1,ARL6IP6,METTL27,VPS37D,CYP27A1,CD55,DDB1,DDO…	508
Abnormality of thyroid physiology	An abnormal functionality of the thyroid gland.	https://hpo.jax.org/app/browse/term/HP:0002926	HP:0002926	2023.1.Hs: Updated to HPO Release 2023-01-27	ADA,KCNJ18,RNU7-1,GNE,TOM1,DNM1L,CDKN1B,STUB1,UBE4B,CDKN1C,APC2,ADAR,DEAF1,IPO8,RNASEH2A,TXNRD2,PDPN,KLF1,STAG2,RAI1,WDR4,PNPLA6,ADCY5,POLR3A,SUPT16H,POLG2,TREX1,FDX2,ADAT3,BUD23,CLCNKB,PROKR2,TANGO2,DNAJC19,COMT,LSM11,TMEM270,CPE,B3GLCT,NKX2-5,CTNS,CTNNB1,ARL6IP6,METTL27,VPS37D,CYP27A1,CD55,DDB1,DDOST,GLIS3,DIO1,DYRK1A,UBR1,ELN,FLCN,AKT1,ALB,EXT2,FARSA,JMJD1C,FGF8,FGF13,FGFR1,FOXG1,FOXI1,PLCH1,S…	390
Aplasia hypolasia of the thyoid gland	Aplasia/Hypoplasia of the thyroid gland. Absence or underdevelopment of the thyroid gland.	https://hpo.jax.org/app/browse/term/HP:0033079	HP:0033079	2023.1.Hs: Updated to HPO Release 2023-01-27	NKX2-5,FOXE1,KAT6B,GLI3,GNB2,DUOX2,NSDHL,POLR1D,SLC26A4,POU1F1,PROP1,TCOF1,NKX2-1,TRHR,TSHB,TSHR,PAX8,LHX3,KMT2D,POLR1B,IRS4,HESX1,LHX4,ADAMTSL1,POLR1C	25
Follicular thyroid carcinoma	The presence of an follicular adenocarcinoma of the thyroid gland.	https://hpo.jax.org/app/browse/term/HP:0006731	HP:0006731	2023.1.Hs: Updated to HPO Release 2023-01-27	KLLN,SEC23B,USF3,AKT1,FOXE1,HABP2,HRAS,NRAS,PDE11A,PIK3CA,PRKAR1A,PTEN,SRGAP1,SDHB,SDHC,SDHD,MINPP1	17
Neoplasm of the thyoid gland	A tumor (abnormal growth of tissue) of the thyroid gland.	https://hpo.jax.org/app/browse/term/HP:0100031	HP:0100031	2023.1.Hs: Updated to HPO Release 2023-01-27	KLLN,RASGRP1,CDKN1A,CDKN1B,CDKN2A,CDKN2B,CDKN2C,SEC23B,SEMA3C,CHEK2,JAG1,ECE1,EDN3,EDNRB,ARID2,FLCN,USF3,ERBB2,ERBB3,AKT1,ABCD1,HEPACAM,SEMA3D,FAN1,FOXI1,FOXE1,DICER1,GREM1,GDNF,MLH3,MSH6,HABP2,APC,HRAS,FAS,FASLG,KCNJ10,KRAS,LMNA,EPCAM,MDM2,MEN1,MLH1,MSH2,MSH3,NRAS,NRTN,PDE11A,SLC26A4,PIK3CA,PMS1,ATP7A,PMS2,PRKAR1A,PRKCD,PTEN,ARID1B,SRGAP1,DPF2,RET,RPS20,SDHB,SDHC,SDHD,SEMA4A,BMPR1A,SMARCA4,SMARC…	85
Autoimmune thyroid disease	The classification of autoimmune throid disease (AITD) includes Hashimoto's thyroiditis (HT) or chronic autoimmune thyroiditis and its variants, Graves' disease (GD) and autoimmune atrophic thyroiditis or primary myxedema. HT is characterized by the presence of goitre, thyroid autoantibodies against thyroid peroxidase (TPO) and thyroglobulin (Tg) in serum and varying degrees of thyroid dysfunctio…	http://www.genome.jp/kegg/pathway/hsa/hsa05320.html	KEGG:hsa05320	2023.2.Hs	CGA,CTLA4,GZMB,HLA-A,HLA-B,HLA-C,HLA-DMA,HLA-DMB,HLA-DOA,HLA-DOB,HLA-DPA1,HLA-DPB1,HLA-DQA1,HLA-DQA2,HLA-DQB1,HLA-DRA,HLA-DRB1,HLA-DRB3,HLA-DRB4,HLA-DRB5,HLA-E,HLA-F,HLA-G,IFNA1,IFNA2,IFNA4,IFNA5,IFNA6,IFNA7,IFNA8,IFNA10,IFNA13,IFNA14,IFNA16,IFNA17,IFNA21,FAS,IL2,FASLG,IL4,IL5,IL10,PRF1,TG,TPO,TSHB,TSHR,CD28,CD80,CD86,CD40,CD40LG	52
Thyroid cancer	Thyroid cancer. Papillary thyroid carcinoma (PTC), the most frequent neoplasia originating from the thyroid epithelium, accounts for about 80% of all thyroid cancers. Chimeric oncogenes, created by chromosomal rearrangements involving prevalently RET and, to a less extent, NTRK1 loci, are implicated in the development of papillary carcinoma.These are inappropriately expressed and stimulate consti…	http://www.genome.jp/kegg/pathway/hsa/hsa05216.html	KEGG:hsa05216	2023.2.Hs	TFG,CTNNB1,HRAS,KRAS,MYC,NRAS,NTRK1,LEF1,PPARG,MAPK1,MAPK3,MAP2K1,MAP2K2,CCND1,RET,RXRA,RXRB,RXRG,BRAF,TCF7,TCF7L2,TP53,TPM3,TPR,PAX8,CCDC6,NCOA4,TCF7L1,CDH1	29
Thyroid differentiation score (TDS)	The continuous thyroid differentiation score (TDS) ranked the samples according to mRNA expression levels within selected set of 16 thyroid function genes. TDS was developed to quantify relationships between thyroid differentiation and diverse genetic or epigenetic events. The Log2-normalized RSEM (Li and Dewey, 2011) values were first centered at the median across samples, yielding Log2(Fold Cha…	https://doi.org/10.1016/j.cell.2014.09.050	Agrawal N, et al. 2014; Giordano TJ. 2018	2014.10	DIO1,DIO2,DUOX1,DUOX2,FOXE1,GLIS3,NKX2-1,PAX8,SLC26A4,SLC5A5,SLC5A8,TG,THRA,THRB,TPO,TSHR	16
ERK activity score	The ERK-activity score is derived from the concurrent variation in mRNA expression of a specific set of genes previously shown to be responsive to MEK inhibition. Precisely, a list of 60 probes matching 52 genes was derived (Pratilas et al., 2009). These genes were differentially expressed in BRAFV600E melanoma cell lines before and after MEK inhibition by PD0325901 (FDR < 2%). Forty-eight of the…	https://doi.org/10.1016/j.cell.2014.09.050	Agrawal N, et al. 2014	2014.10	DUSP6,PLK3,MAFF,LIF,FOSL1,IL8,IER3,TNFRSF12A,PHLDA2,TNC,SLC1A5,ETV4,ETV5,ETV1,CCND1,DUSP4,HMGA2,SPRED2,CD3EAP,HYDIN,B4GALT6,SLC4A7,CHSY1,ELOVL6,ARID5A,KIR3DL2,GTF2A1L,MYC,YRDC,GNL3,BRIX1,RRS1,DDX21,WDR3,TSR1,GTPBP4,PPAT,GEMIN4,POLR3G,SPRY2,EGR1,FOS,GPR3,SH2B3,SPRY4,SEMA6A,MAP2K3,BYSL,PPAN,NOP16,POLR1C,PYCRL	52
BRAFV600E-RAS score (BRS)	The most prevalent oncogenic events in thyroid papillary tumors are BRAFV600E mutations and RAS activating mutations. Using the expression of these 71 genes to determine an mRNA-based signature score that quantifies the resemblance of a given tumor to either the B or R set. Tumors with negative BRS (closer to B than to R) were defined BRAFV600E-like, while tumors with positive BRS (closer to R th…	https://doi.org/10.1016/j.cell.2014.09.050	Agrawal N, et al. 2014; Fagin JA. 2023	2014.10	ANKRD46,CYB561,GNA14,HGD,KATNAL2,KCNAB1,KCNIP3,LGI3,MLEC,NQO1,SFTPC,SLC4A4,SORBS2,ABTB2,AHR,ANKLE2,ANDXA1,ANDXA2P2,ARNTL,ASAP2,BID,CDC42EP1,COLBA2,CREB5,CTSC,CYP1B1,DTX4,DUSP5,ETHE1,FAM176A,FAM20C,FCHO1,FLJ23867,FN1,FSTL3,GABRB2,GBP2,ITGA3,ITGB8,KCNN4,LAMB3,LLGL1,LY6E,MDFIC,MET,PDE5A,PDLIM4,PLCD3,PLEKHA6,PNPLA5,PPL,PRICKLE1,PROS1,PTPRE,PVRL4,RASGEFIB,RUNX1,RUNX2,SDC4,SEL1L3,SFTPB,SLC35F2,SOX4,SPO…	71
MAPK signaling pathway	The Mitogen-Activated Protein Kinase (MAPK) signaling pathway is a crucial intracellular signaling pathway that regulates various cellular processes such as cell proliferation, differentiation, apoptosis, and response to environmental stress. This pathway is highly conserved among eukaryotes and plays a fundamental role in transducing extracellular signals to cellular responses.	https://pathcards.genecards.org/Card/mapk_signaling_pathway	Huang K, et al. 2016; Fagin JA. 2023	2023.06	PLA2G4E,RASGRP3,NRAS,PRKCD,PTPRR,RELA,TGFBR1,PLA2G4C,PLA2G4F,RASGRP1,FGF11,IL1A,PPP3CA,CACNA1B,RAPGEF2,DUSP6,FGF12,HSPA1A,ARRB2,CDC42,MAPK13,TAOK3,FGF20,NTF3,PRKCG,MAP4K2,RELB,TNF,LAMTOR3,PLA2G4D,MAP3K2,FGFR1,JUN,PPP3CB,CACNA1D,CACNA1C-IT2,DUSP7,FGF13,HSPA1B,ATF4,RASGRP4,MAP2K1,MAP3K20,STMN1,PAK1,MAPK1,RAC1,RPS6KA3,TNFRSF1A,FGF18,ARAF,MAP4K1,FGFR3,JUND,PPP3CC,CACNA2D1,CHUK,DUSP8,FGF14,HSPA1L,BDNF…	245
PI3K-Akt signaling pathway	The PI3K-Akt signaling pathway is another crucial intracellular signaling pathway that plays a key role in regulating various cellular processes, including cell survival, growth, proliferation, and metabolism. This pathway is often dysregulated in cancer and other diseases, making it a focus of research for therapeutic interventions. Dysregulation of the PI3K-Akt pathway is associated with variou…	https://pathcards.genecards.org/Card/pi3k-akt_signaling_pathway	Huang K, et al. 2016; Singh A. 2021	2023.06	GNG2,PHLPP2,MET,PIK3R1,MAPK3,TEK,FGF18,CHRM1,FGFR2,IL4R,NGF,TNXB,COL4A2,LPAR1,FGF6,GNG4,TNC,INS,JAK1,CREB3L1,IBSP,PIK3AP1,PPP2R2A,TP53,NTRK2,COL4A5,GH2,IFNA21,COL6A6,NOS1,RAB10,PFKFB3,ITGB2,PPP2R3C,FGF20,NOS3,PIK3R2,PRL,THBS1,LPAR2,CHRM2,FOXO3,INSR,NGFR,TSC2,COL4A4,EFNA1,FGF7,GNG5,IFNA7,IRS1,KIT,GNG8,IGF1,G6PC2,PRKCA,CCNE2,CCND1,COL6A1,IFNA1,IGF2,PIK3R6,NOS2,AKT1S1,PFKFB4,PIK3IP1,PPP2R2D,LAMA2,NR…	390
mTOR signaling	The mechanistic target of rapamycin (mTOR) is a central component of cellular signaling that integrates various signals related to nutrient availability, energy status, and growth factors. The mTOR signaling pathway plays a crucial role in regulating cellular processes such as protein synthesis, cell growth, proliferation, autophagy, and metabolism. Dysregulation of the mTOR pathway has been impl…	https://pathcards.genecards.org/Card/mtor_signalling	Huang K, et al. 2016; Singh A. 2021	2023.06	RRAGB,RRAGA,MTOR,RPTOR,RRAGD,RHEB,RRAGC,MLST8,TSC1,TSC2,LAMTOR5,SLC38A9,EIF4EBP1,FKBP1A,LAMTOR2,LAMTOR4,PRKAG2,PRKAG3,LAMTOR1,PRKAA1,PRKAA2,PRKAB1,PRKAB2,PRKAG1,RPS6KB1,AKT1S1,LAMTOR3,EIF4B,EIF4E,EIF4G1,AKT1,AKT2,EEF2K,CAB39,PPM1A,STRADB,RPS6,STK11,YWHAB,CAB39L,STRADA,HMGCR,IDI1,CDC42,RICTOR,MAPKAP1,DDIT4L,PRR5L,ULK3,PRKCA,RAC1,ULK1,ULK2,DDIT4,PRR5	55
Signaling by Wnt	Wnt signaling is a highly conserved pathway that plays a crucial role in various developmental processes and the maintenance of adult tissue homeostasis. The Wnt pathway is involved in cell fate determination, cell proliferation, migration, and the regulation of stem cell populations. Dysregulation of Wnt signaling has been associated with several developmental disorders and diseases, including c…	https://pathcards.genecards.org/Card/signaling_by_wnt	Huang K, et al. 2016	2023.06	FRAT1,CREBBP,DVL2,PYGO1,H3-3A,MYC,PPP2R5B,PSMA5,PSMB10,PSMD5,KLHL12,SOX3,UBA52,KREMEN2,FZD4,H2BC7,H3C11,H4C8,CAV1,PSMF1,CTBP2,AGO2,GNG11,ROR2,PLCB3,GNG12,WNT6,CALM3,PSME3,AMER1,DVL3,DKK4,H3-3B,H2AB1,PPP2R5C,PSMA6,CTNNBIP1,PSMD7,LGR6,SOX4,UBB,CDC73,FZD6,TCF7L1,H3C8,H4C2,RUVBL1,SOX13,AP2A1,TNRC6A,GNGT1,PARD6A,GNG2,SMURF1,WNT7A,WNT5B,PSMD14,PSMA8,EP300,DKK2,HDAC1,SOST,PPP2R5D,PSMA7,PSMC1,PSMD8,BCL9,…	332
DNA repair pathway	DNA repair pathways are essential mechanisms that cells use to correct damage to their DNA, ensuring genomic stability. Various environmental factors, such as radiation, chemicals, and metabolic processes, can lead to DNA damage. Failure to repair DNA damage properly can result in mutations, genomic instability, and ultimately contribute to various diseases, including cancer. Here are some key DN…	https://pathcards.genecards.org/Card/dna_repair_pathways_full_network	Huang K, et al. 2016	2023.06	POLD1,ERCC1,MLH1,RBX1,MNAT1,RAD50,NHEJ1,POLR2C,HMGB1,MGMT,UNG,CENPS,PCNA,ERCC4,PMS2,POLE2,RAD23A,RAD54B,PARP2,RPS27A,APEX1,NTHL1,MBD4,POLD4,GTF2H1,ERCC8,XPC,POLK,RAD51,PARP1,UBA52,MPG,USP1,WDR48,POLD3,GTF2H2,DDB1,POLE3,LIG4,RAD52,SLX4IP,UBB,MUTYH,POLI,FANCM,POLD2,GTF2H3,DDB2,POLE4,BRCA1,XRCC6,UVSSA,UBC,ATR,FAN1,PALB2,RPA1,RFC4,ERCC2,GTF2H5,XRCC1,PRKDC,SLX4,CHEK1,CENPX,SMUG1,FAAP100,RPA2,RFC5,ERCC…	133
Ras signaling	Ras signaling is a crucial cellular pathway involved in the regulation of various cellular processes, including cell growth, differentiation, survival, and apoptosis. The Ras pathway is often dysregulated in human cancers, making it a focus of intense research for cancer therapy. The Ras signaling pathway is initiated by the activation of Ras proteins, which act as molecular switches.	https://pathcards.genecards.org/Card/ras_signaling	Huang K, et al. 2016; Singh A. 2021	2023.06	BUB1B-PAK6,GAB1,HRAS,PAK3,RASAL3,GNGT2,FGFR1,KDR,CALM3,PLA2G2D,PLD1,PTPN11,RAP1B,TIAM1,PLA2G4E,PLA2G2F,CHUK,ABL2,FASLG,PDGFRA,PLA2G12A,IGF1R,FGFR3,ARF6,CALML3,PIK3CA,PLD2,RAB5A,RASA1,ZAP70,CALML5,AKT1,CSF1R,GNG3,KIT,PDGFRB,RASSF5,EXOC2,FGFR2,AFDN,BRAP,PIK3CB,PRKACA,RAB5B,RASA2,PLA2G6,GNG2,AKT2,EGFR,GNG4,KRAS,BCL2L1,TTBK1,MAPK10,MRAS,FOXO4,RASAL1,PIK3CD,PRKACB,RAB5C,RASGRF1,PLA2G10,GNG12,ELK1,GNG5…	183
RET signaling	RET (rearranged during transfection) is a receptor tyrosine kinase that plays a crucial role in various cellular processes, including cell survival, proliferation, differentiation, and migration. The RET signaling pathway is particularly important during embryonic development and is implicated in diseases such as cancer.	https://pathcards.genecards.org/Card/ret_signaling	Huang K, et al. 2016; Singh A. 2021	2023.06	FRS2,DOK1,DOK6,GAB1,GDNF,GFRA1,GRB2,GRB7,GRB10,PIK3CA,PIK3R1,PRKACA,DOK4,PRKCA,DOK5,PTPN11,RET,SHC1,SOS1,SRC,IRS2,PDLIM7,GFRA2,GFRA3,NRTN,PIK3CB,PIK3CD,PIK3R2,PLCG1,SHC3,PRKACB,PRKACG,MAPK7,PSPN,RAP1GAP,GFRA4,PIK3R3,DOK2,ARTN,GAB2,NCK1,JUN,PTK2,HRAS,MAPK3,MAPK8,CREB1,RHOA,RAC1,CRK,PXN,RAP1A,IRS1,RASA1,BCAR1	55
Signaling by NTRKs	NTRKs, or neurotrophic receptor tyrosine kinases, are a family of receptor tyrosine kinases that play a crucial role in the development and maintenance of the nervous system. The three members of the NTRK family are NTRK1 (TrkA), NTRK2 (TrkB), and NTRK3 (TrkC). These receptors are activated by neurotrophins, a family of growth factors that includes nerve growth factor (NGF), brain-derived neurotr…	https://pathcards.genecards.org/Card/signaling_by_ntrks	Huang K, et al. 2016; Singh A. 2021	2023.06	NTRK3,NTRK1,NTF3,IRS1,NGF,PIK3CA,PIK3R1,ADCYAP1,ADCYAP1R1,ADORA2A,GRB2,HRAS,KRAS,NRAS,NTRK2,PLCG1,SHC1,SOS1,SRC,DNAL4,AP2M1,AP2S1,CLTA,CLTC,AP2A1,AP2A2,AP2B1,DNM1,DNM2,DNM3,RHOA,PIK3CB,PIK3R2,SH3GL2,IRS2,NELFB,BAX,CDK5,TRIB1,FRS2,CHD4,CREB1,ATF2,CRK,CRKL,MAPK14,DUSP3,DUSP4,DUSP6,DUSP7,EGR1,EGR2,EGR3,EGR4,ELK1,EP300,F3,ARC,FOS,FOSB,SHC2,RAPGEF1,ID1,ID2,ID3,ID4,JUNB,JUND,LYL1,MEF2A,MEF2C,MEF2D,ASCL…	134
TP53 network	The TP53 network refers to the intricate and interconnected pathways associated with the TP53 gene and its protein product, p53. The TP53 gene encodes the p53 protein, often referred to as the "guardian of the genome," due to its critical role in maintaining genomic stability and preventing the development of cancer. The TP53 network encompasses various signaling pathways and cellular processes t…	https://pathcards.genecards.org/Card/tp53_network	Huang K, et al. 2016; Fagin JA. 2023; Singh A. 2021	2023.06	BAX,BID,MDM2,MYC,OTX2,PMAIP1,TP53,TP73,TP63,GADD45A,BBC3,TNFSF10,CDKN1A,CDKN2A,ABL1,ATM,BCL2,BOK	18
Telomere C-strand Synthesis	Telomeres are repetitive DNA sequences located at the ends of linear chromosomes, and they play a crucial role in maintaining genomic stability. Telomere C-strand synthesis is part of the process involved in maintaining and elongating the telomeric DNA, particularly the C-rich (complementary) strand. The primary function of telomeres is to protect the ends of chromosomes from deterioration and fu…	https://pathcards.genecards.org/Card/telomere_c-strand_(lagging_strand)_synthesis	Huang K, et al. 2016; Singh A. 2021	2023.06	POT1,TINF2,TERF2IP,ACD,TERF1,TERF2,POLD3,PCNA,POLD1,POLD2,POLD4,POLA2,POLA1,PRIM1,PRIM2,RFC1,RFC2,RFC3,RFC4,RFC5,TEN1,DNA2,FEN1,RPA1,RPA2,RPA3,WRN,STN1,CTC1,LIG1,CHTF8,CHTF18,BLM,DSCC1,CDK2,RUVBL2,DKC1,ANKRD28,RTEL1,GAR1,WRAP53,SHQ1,PPP6R3,PPP6C,NOP10,NHP2,TERT,PIF1,RUVBL1,CCNA2,CCNA1	51
References
1. Agrawal N, Akbani R, Aksoy BA, Ally A, Arachchi H, Asa SL, et al. Integrated Genomic Characterization of Papillary Thyroid Carcinoma. Cell. 2014;159:676–90.
2. Huang K, Cui M, Ye F, Li Y, Zhang D. Global profiling of the signaling network of papillary thyroid carcinoma. Life Sci. 2016;147:9-14.
3. Giordano TJ. Genomic Hallmarks of Thyroid Neoplasia. Annu Rev Pathol. 2018;13:141-162.
4. Fagin JA, Krishnamoorthy GP, Landa I. Pathogenesis of cancers derived from thyroid follicular cells. Nat Rev Cancer. 2023;23(9):631-650.
5. Singh A, Ham J, Po JW, Niles N, Roberts T, Lee CS. The Genomic Landscape of Thyroid Cancer Tumourigenesis and Implications for Immunotherapy. Cells. 2021;10(5):1082.

## Sheet: Table S4
Table S4. Immunomodulatory genes list
Type	Genes	References
Co-inhibitors	ADORA2A, BTLA, CD160, CD244, CD274, CD96, CSF1R, CTLA4, HAVCR2, IDO1, IL10, IL10RB, KDR, KIR2DL1, KIR2DL3, LAG3, LGALS9, PDCD1, PDCD1LG2, PVRL2, TGFB1, TGFBR1, TIGIT, VTCN1	Xiao Y, 2019; Zhong X, 2022; Chen X, 2021
Co-stimulators	BTNL2, C10orf54, CD27, CD276, CD28, CD40, CD40LG, CD48, CD70, CD80, CD86, CXCL12, CXCR4, ENTPD1, HHLA2, ICOS, ICOSLG, IL2RA, IL6, IL6R, KLRC1, KLRK1, LTA, MICB, NT5E, PVR, RAET1E, TMEM173, TMIGD2, TNFRSF13B, TNFRSF13C, TNFRSF14, TNFRSF17, TNFRSF18, TNFRSF25, TNFRSF4, TNFRSF8, TNFRSF9, TNFSF13, TNFSF13B, TNFSF14, TNFSF15, TNFSF18, TNFSF4, TNFSF9, ULBP1	Xiao Y, 2019; Zhong X, 2022; Chen X, 2021
Antigen presentation molecules	B2M, HLA-A, HLA-B, HLA-C, HLA-DMA, HLA-DMB, HLA-DOA, HLA-DOB, HLA-DPA1, HLA-DPB1, HLA-DQA1, HLA-DQA2, HLA-DQB1, HLA-DRA, HLA-DRB1, HLA-E, HLA-F, HLA-G, TAP1, TAP2, TAPBP	Xiao Y, 2019; Zhong X, 2022; Chen X, 2021
Interferons and receptors	IFNA1, IFNA5, IFNA8, IFNAR2, IFNB1, IFNE, IFNG, IFNGR2, IFNA1, IFNA2, IFNA4, IFNA5, IFNA6, IFNA7, IFNA8, IFNA10, IFNA13, IFNA14, IFNA16, IFNA17, IFNA21, IFNB1, IFNE, IFNK, IFNW1, IFNG, IFNL1, IFNL2, IFNL3, IFNL4	Xiao Y, 2019; Chen X, 2021
Interleukins and receptors	IL1A, IL1B, IL1R1, IL1R2, IL4R, IL5, IL6, IL7R, IL9R, IL10, IL10RA, IL10RB, IL11, IL12A, IL12B, IL12RB2, IL17B, IL17D, IL17RD, IL18, IL18.1, IL21R, IL22, IL23A, IL24, IL26, IL27, IL27RA, IL2RA, IL2RB, IL2RG, IL31RA, IL32, IL33, IL34	Xiao Y, 2019; Chen X, 2021
Chemokines and receptors	CCL1, CCL3, CCL4, CCL5, CCL7, CCL8, CCL11, CCL14, CCL16, CCL17, CCL18, CCL20, CCL21, CCL22, CCL25, CCL26, CCL28, CCR1, CCR2, CCR3, CCR4, CCR5, CCR6, CCR7, CCR8, CCR9, CCR10, CX3CL1, CX3CR1, CXCL2, CXCL6, CXCL9, CXCL10, CXCL11, CXCL12, CXCL13, CXCL14, CXCL16, CXCR1, CXCR2, CXCR3, CXCR4, CXCR6, CXCR7, PF4, PPBP, XCL1, XCL2	Xiao Y, 2019; Chen X, 2021
Other cytokines	ARG1, CSF1, CSF2, CSF2RB, EGF, EGFR, EPOR, FAS, FASLG, IDO1, LTA, PDGFC, PDGFD, PDGFRA, PDGFRB, TGFB3, TGFBR1, TGFBR2, TGFBR3, TNF, TPO, VEGFA, VEGFB, VEGFC	Xiao Y, 2019; Chen X, 2021
References
1. Xiao Y, Ma D, Zhao S, Suo C, Shi J, Xue MZ, et al. Multi-Omics Profiling Reveals Distinct Microenvironment Characterization and Suggests Immune Escape Mechanisms of Triple-Negative Breast Cancer. Clin Cancer Res. 2019;25(16):5002-5014.
2. Zhong X, Xu S, Wang Q, Peng L, Wang F, He T, et al. CAPN8 involves with exhausted, inflamed, and desert immune microenvironment to influence the metastasis of thyroid cancer. Front Immunol. 2022;13:1013049.
3. Chen X, Chen H, Yao H, Zhao K, Zhang Y, He D, et al. Turning up the heat on non-immunoreactive tumors: pyroptosis influences the tumor immune microenvironment in bladder cancer. Oncogene. 2021;40(45):6381-6393.

## Sheet: Table S5
Table S5. Detail information of the HPA patients and the antibodies
Protein	Antibody	Concentration	Tissue	Patient ID	Gender	Age	Staining	Intensity	Quality	Location
CXCL8	HPA057179	0.1982 mg/ml	Normal tissue, NOS (M-00100)	1691	Female	36	Not detected	Weak	<25%	Cytoplasmic/membranous
			Papillary adenocarcinoma, NOS (M-82603)	4270	Male	87	Not detected	Weak	<25%	Cytoplasmic/membranous
GJA1	HPA035097	0.0142 mg/ml	Normal tissue, NOS (M-00100)	3005	Female	44	Medium	Moderate	>75%	Cytoplasmic/membranous
			Papillary adenocarcinoma, NOS (M-82603)	3037	Female	59	Not detected	Weak	<25%	Cytoplasmic/membranous
H2BC8	HPA043013	0.1256 mg/ml	Normal tissue, NOS (M-00100)	1948	Female	39	High	Strong	>75%	Nuclear
			Papillary adenocarcinoma, NOS (M-82603)	4106	Female	68	High	Strong	>75%	Nuclear
IFI27	HPA028875	0.1368 mg/ml	Normal tissue, NOS (M-00100)	1712	Female	22	High	Strong	>75%	Cytoplasmic/membranous
			Papillary adenocarcinoma, NOS (M-82603)	2623	Male	77	Low	Moderate	<25%	Cytoplasmic/membranous
PRDM1	HPA075427	0.0585 mg/ml	Normal tissue, NOS (M-00100)	1659	Male	63	Medium	Moderate	>75%	Cytoplasmic/membranous
			Papillary adenocarcinoma, NOS (M-82603)	1041	Female	37	Medium	Moderate	>75%	Cytoplasmic/membranous
PYCARD	HPA049074	0.0282 mg/ml	Normal tissue, NOS (M-00100)	1712	Female	22	Low	Weak	75%-25%	Cytoplasmic/membranous
			Papillary adenocarcinoma, NOS (M-82603)	4270	Male	87	Low	Weak	75%-25%	Cytoplasmic/membranous
TRAF6	HPA019805	0.435 mg/ml	Normal tissue, NOS (M-00100)	1672	Male	56	Low	Moderate	<25%	Cytoplasmic/membranous
			Papillary adenocarcinoma, NOS (M-82603)	3267	Male	33	Low	Weak	75%-25%	Cytoplasmic/membranous
SEZ6L2	HPA064471	0.047 mg/ml	Normal tissue, NOS (M-00100)	3239	Female	56	Not detected	Weak	<25%	Cytoplasmic/membranous
			Papillary adenocarcinoma, NOS (M-82603)	4248	Female	75	Low	Weak	>75%	Cytoplasmic/membranous
SIGLEC15	Not available

## Sheet: Table S6
Table S6. Premier sequences for qRT-PCR analysis
Gene	Forward premier	Reverse premier
CXCL8	GGTGCAGTTTTGCCAAGGAG	TTCCTTGGGGTCCAGACAGA
GJA1	TCTTCATGCTGGTGGTGTCC	ACCACTGGTCGCATGGTAAG
H2BC8	ACAGGTTCACCCCGATACTG	GGTCGAGCGCTTGTTGTAGT
IFI27	GCAACTGGACTCTCCGGATT	TAGAACCTCGCAATGACAGCC
PRDM1	TCAGACTTGCAACAAGGGCT	CTTGAGATTGCTGGTGCTGC
PYCARD	CAAGCAAGATGCGGAAGCTC	GTCCTCCACCAGGTAGGACT
TRAF6	TTGGCCCAGGCTGTTCATAG	CAAGGCGACCCTCTAACTGG
SEZ6L2	GCACTTCAAAGAGGTCCCGA	CCAGGGTCAGCACAAGTCAT
SIGLEC15	TCTCCCGACAGGCTCATTTG	GTGCACCTCTGTGTTGAGCA
hGAPDH	TCAAGGCTGAGAACGGGAAG	TGGACTCCACGACGTACTCA
